# Supplementary material for: An efficient and cost-effective method for primer-induced nucleotide labeling for massive sequencing on next-generation sequencing platforms
Source: PubMed Central journal article supplement (PMC6395609; doi:10.1038/s41598-019-38996-8), 2019-02-28
Supplement: 41598_2019_38996_MOESM1_ESM.pdf [file 41598_2019_38996_MOESM1_ESM.pdf]

**An efficient and cost-effective method for primer-induced nucleotide labelling  
for massive sequencing on next-generation sequencing platforms**

Junjie Guo<sup>1,3,†</sup>, Tao Cheng<sup>2,†</sup>, Han Xu<sup>1,3</sup>, Yide Li<sup>1,3\*</sup>, Jie Zeng<sup>1,3,\*</sup>

**Supplementary information**

**Table S1. The information of three barcodes used in this study**

| Name        | Sequences(5'-3')             | Ta(°C) |
|-------------|------------------------------|--------|
| <i>ITS</i>  | F:TCCTACCGATTGAATGRTCCGG     | 52     |
|             | R:AGCCTTRGAHGGRATTTACC       |        |
| <i>matK</i> | F:CCCRTYCATCTGGAAATCTTGGTTC  | 52     |
|             | R:GCTRTRATAATGAGAAAGATTTCTGC |        |
| <i>rbcL</i> | F:AGACCTWTTTGAAGAAGGTTCTGT   | 52     |
|             | R:TCGGTYAGAGCRGGCATATGCCA    |        |

**Table S2. The sequences of all 960 pentanucleotide labels**

| Name | Sequences(5'-3') |
|------|------------------|
| H001 | AACAA            |
| H002 | AACAC            |
| H003 | AACAG            |
| H004 | AACAT            |
| H005 | AACCA            |
| H006 | AACCG            |
| H007 | AACCT            |
| H008 | AACGA            |
| H009 | AACGC            |

|      |       |
|------|-------|
| H010 | AACGG |
| H011 | AACGT |
| H012 | AACTA |
| H013 | AACTC |
| H014 | AACTG |
| H015 | AACTT |
| H016 | AAGAA |
| H017 | AAGAC |
| H018 | AAGAG |
| H019 | AAGAT |
| H020 | AAGCA |
| H021 | AAGCC |
| H022 | AAGCG |
| H023 | AAGCT |
| H024 | AAGGA |
| H025 | AAGGC |
| H026 | AAGGT |
| H027 | AAGTA |
| H028 | AAGTC |
| H029 | AAGTG |
| H030 | AAGTT |
| H031 | AATAA |
| H032 | AATAC |
| H033 | AATAG |
| H034 | AATAT |
| H035 | AATCA |
| H036 | AATCC |
| H037 | AATCG |
| H038 | AATCT |
| H039 | AATGA |
| H040 | AATGC |
| H041 | AATGG |
| H042 | AATGT |
| H043 | AATTA |
| H044 | AATTC |
| H045 | AATTG |
| H046 | ACAAC |
| H047 | ACAAG |
| H048 | ACAAT |
| H049 | ACACA |
| H050 | ACACC |
| H051 | ACACG |
| H052 | ACACT |

|      |       |
|------|-------|
| H053 | ACAGA |
| H054 | ACAGC |
| H055 | ACAGG |
| H056 | ACAGT |
| H057 | ACATA |
| H058 | ACATC |
| H059 | ACATG |
| H060 | ACATT |
| H061 | ACCAA |
| H062 | ACCAC |
| H063 | ACCAG |
| H064 | ACCAT |
| H065 | ACCCA |
| H066 | ACCCG |
| H067 | ACCCT |
| H068 | ACCGA |
| H069 | ACCGC |
| H070 | ACCGG |
| H071 | ACCGT |
| H072 | ACCTA |
| H073 | ACCTC |
| H074 | ACCTG |
| H075 | ACCTT |
| H076 | ACGAA |
| H077 | ACGAC |
| H078 | ACGAG |
| H079 | ACGAT |
| H080 | ACGCA |
| H081 | ACGCC |
| H082 | ACGCG |
| H083 | ACGCT |
| H084 | ACGGA |
| H085 | ACGGC |
| H086 | ACGGT |
| H087 | ACGTA |
| H088 | ACGTC |
| H089 | ACGTG |
| H090 | ACGTT |
| H091 | ACTAA |
| H092 | ACTAC |
| H093 | ACTAG |
| H094 | ACTAT |
| H095 | ACTCA |

|      |       |
|------|-------|
| H096 | ACTCC |
| H097 | ACTCG |
| H098 | ACTCT |
| H099 | ACTGA |
| H100 | ACTGC |
| H101 | ACTGG |
| H102 | ACTGT |
| H103 | ACTTA |
| H104 | ACTTC |
| H105 | ACTTG |
| H106 | AGAAC |
| H107 | AGAAG |
| H108 | AGAAT |
| H109 | AGACA |
| H110 | AGACC |
| H111 | AGACG |
| H112 | AGACT |
| H113 | AGAGA |
| H114 | AGAGC |
| H115 | AGAGG |
| H116 | AGAGT |
| H117 | AGATA |
| H118 | AGATC |
| H119 | AGATG |
| H120 | AGATT |
| H121 | AGCAA |
| H122 | AGCAC |
| H123 | AGCAG |
| H124 | AGCAT |
| H125 | AGCCA |
| H126 | AGCCG |
| H127 | AGCCT |
| H128 | AGCGA |
| H129 | AGCGC |
| H130 | AGCGG |
| H131 | AGCGT |
| H132 | AGCTA |
| H133 | AGCTC |
| H134 | AGCTG |
| H135 | AGCTT |
| H136 | AGGAA |
| H137 | AGGAC |
| H138 | AGGAG |

|      |       |
|------|-------|
| H139 | AGGAT |
| H140 | AGGCA |
| H141 | AGGCC |
| H142 | AGGCG |
| H143 | AGGCT |
| H144 | AGGGA |
| H145 | AGGGC |
| H146 | AGGGT |
| H147 | AGGTA |
| H148 | AGGTC |
| H149 | AGGTG |
| H150 | AGGTT |
| H151 | AGTAA |
| H152 | AGTAC |
| H153 | AGTAG |
| H154 | AGTAT |
| H155 | AGTCA |
| H156 | AGTCC |
| H157 | AGTCG |
| H158 | AGTCT |
| H159 | AGTGA |
| H160 | AGTGC |
| H161 | AGTGG |
| H162 | AGTGT |
| H163 | AGTTA |
| H164 | AGTTC |
| H165 | AGTTG |
| H166 | ATAAC |
| H167 | ATAAG |
| H168 | ATAAT |
| H169 | ATACA |
| H170 | ATACC |
| H171 | ATACG |
| H172 | ATACT |
| H173 | ATAGA |
| H174 | ATAGC |
| H175 | ATAGG |
| H176 | ATAGT |
| H177 | ATATA |
| H178 | ATATC |
| H179 | ATATG |
| H180 | ATATT |
| H181 | ATCAA |

|      |       |
|------|-------|
| H182 | ATCAC |
| H183 | ATCAG |
| H184 | ATCAT |
| H185 | ATCCA |
| H186 | ATCCG |
| H187 | ATCCT |
| H188 | ATCGA |
| H189 | ATCGC |
| H190 | ATCGG |
| H191 | ATCGT |
| H192 | ATCTA |
| H193 | ATCTC |
| H194 | ATCTG |
| H195 | ATCTT |
| H196 | ATGAA |
| H197 | ATGAC |
| H198 | ATGAG |
| H199 | ATGAT |
| H200 | ATGCA |
| H201 | ATGCC |
| H202 | ATGCG |
| H203 | ATGCT |
| H204 | ATGGA |
| H205 | ATGGC |
| H206 | ATGGT |
| H207 | ATGTA |
| H208 | ATGTC |
| H209 | ATGTG |
| H210 | ATGTT |
| H211 | ATTAA |
| H212 | ATTAC |
| H213 | ATTAG |
| H214 | ATTAT |
| H215 | ATTCA |
| H216 | ATTCC |
| H217 | ATTCG |
| H218 | ATTCT |
| H219 | ATTGA |
| H220 | ATTGC |
| H221 | ATTGG |
| H222 | ATTGT |
| H223 | ATTTA |
| H224 | ATTC  |

|      |       |
|------|-------|
| H225 | ATTTG |
| H226 | CAAAC |
| H227 | CAAAG |
| H228 | CAAAT |
| H229 | CAACA |
| H230 | CAACC |
| H231 | CAACG |
| H232 | CAACT |
| H233 | CAAGA |
| H234 | CAAGC |
| H235 | CAAGG |
| H236 | CAAGT |
| H237 | CAATA |
| H238 | CAATC |
| H239 | CAATG |
| H240 | CAATT |
| H241 | CACAA |
| H242 | CACAC |
| H243 | CACAG |
| H244 | CACAT |
| H245 | CACCA |
| H246 | CACCG |
| H247 | CACCT |
| H248 | CACGA |
| H249 | CACGC |
| H250 | CACGG |
| H251 | CACGT |
| H252 | CACTA |
| H253 | CACTC |
| H254 | CACTG |
| H255 | CACTT |
| H256 | CAGAA |
| H257 | CAGAC |
| H258 | CAGAG |
| H259 | CAGAT |
| H260 | CAGCA |
| H261 | CAGCC |
| H262 | CAGCG |
| H263 | CAGCT |
| H264 | CAGGA |
| H265 | CAGGC |
| H266 | CAGGT |
| H267 | CAGTA |

|      |       |
|------|-------|
| H268 | CAGTC |
| H269 | CAGTG |
| H270 | CAGTT |
| H271 | CATAA |
| H272 | CATAC |
| H273 | CATAG |
| H274 | CATAT |
| H275 | CATCA |
| H276 | CATCC |
| H277 | CATCG |
| H278 | CATCT |
| H279 | CATGA |
| H280 | CATGC |
| H281 | CATGG |
| H282 | CATGT |
| H283 | CATTA |
| H284 | CATTC |
| H285 | CATTG |
| H286 | CCAAC |
| H287 | CCAAG |
| H288 | CCAAT |
| H289 | CCACA |
| H290 | CCACC |
| H291 | CCACG |
| H292 | CCACT |
| H293 | CCAGA |
| H294 | CCAGC |
| H295 | CCAGG |
| H296 | CCAGT |
| H297 | CCATA |
| H298 | CCATC |
| H299 | CCATG |
| H300 | CCATT |
| H301 | CCGAA |
| H302 | CCGAC |
| H303 | CCGAG |
| H304 | CCGAT |
| H305 | CCGCA |
| H306 | CCGCC |
| H307 | CCGCG |
| H308 | CCGCT |
| H309 | CCGGA |
| H310 | CCGGC |



|      |       |
|------|-------|
| H311 | CCGGT |
| H312 | CCGTA |
| H313 | CCGTC |
| H314 | CCGTG |
| H315 | CCGTT |
| H316 | CCTAA |
| H317 | CCTAC |
| H318 | CCTAG |
| H319 | CCTAT |
| H320 | CCTCA |
| H321 | CCTCC |
| H322 | CCTCG |
| H323 | CCTCT |
| H324 | CCTGA |
| H325 | CCTGC |
| H326 | CCTGG |
| H327 | CCTGT |
| H328 | CCTTA |
| H329 | CCTTC |
| H330 | CCTTG |
| H331 | CGAAC |
| H332 | CGAAG |
| H333 | CGAAT |
| H334 | CGACA |
| H335 | CGACC |
| H336 | CGACG |
| H337 | CGACT |
| H338 | CGAGA |
| H339 | CGAGC |
| H340 | CGAGG |
| H341 | CGAGT |
| H342 | CGATA |
| H343 | CGATC |
| H344 | CGATG |
| H345 | CGATT |
| H346 | CGCAA |
| H347 | CGCAC |
| H348 | CGCAG |
| H349 | CGCAT |
| H350 | CGCCA |
| H351 | CGCCG |
| H352 | CGCCT |
| H353 | CGCGA |

|      |       |
|------|-------|
| H354 | CGCGC |
| H355 | CGCGG |
| H356 | CGCGT |
| H357 | CGCTA |
| H358 | CGCTC |
| H359 | CGCTG |
| H360 | CGCTT |
| H361 | CGGAA |
| H362 | CGGAC |
| H363 | CGGAG |
| H364 | CGGAT |
| H365 | CGGCA |
| H366 | CGGCC |
| H367 | CGGCG |
| H368 | CGGCT |
| H369 | CGGGA |
| H370 | CGGGC |
| H371 | CGGGT |
| H372 | CGGTA |
| H373 | CGGTC |
| H374 | CGGTG |
| H375 | CGGTT |
| H376 | CGTAA |
| H377 | CGTAC |
| H378 | CGTAG |
| H379 | CGTAT |
| H380 | CGTCA |
| H381 | CGTCC |
| H382 | CGTCG |
| H383 | CGTCT |
| H384 | CGTGA |
| H385 | CGTGC |
| H386 | CGTGG |
| H387 | CGTGT |
| H388 | CGTTA |
| H389 | CGTTC |
| H390 | CGTTG |
| H391 | CTAAC |
| H392 | CTAAG |
| H393 | CTAAT |
| H394 | CTACA |
| H395 | CTACC |
| H396 | CTACG |

|      |       |
|------|-------|
| H397 | CTACT |
| H398 | CTAGA |
| H399 | CTAGC |
| H400 | CTAGG |
| H401 | CTAGT |
| H402 | CTATA |
| H403 | CTATC |
| H404 | CTATG |
| H405 | CTATT |
| H406 | CTCAA |
| H407 | CTCAC |
| H408 | CTCAG |
| H409 | CTCAT |
| H410 | CTCCA |
| H411 | CTCCG |
| H412 | CTCCT |
| H413 | CTCGA |
| H414 | CTCGC |
| H415 | CTCGG |
| H416 | CTCGT |
| H417 | CTCTA |
| H418 | CTCTC |
| H419 | CTCTG |
| H420 | CTCTT |
| H421 | CTGAA |
| H422 | CTGAC |
| H423 | CTGAG |
| H424 | CTGAT |
| H425 | CTGCA |
| H426 | CTGCC |
| H427 | CTGCG |
| H428 | CTGCT |
| H429 | CTGGA |
| H430 | CTGGC |
| H431 | CTGGT |
| H432 | CTGTA |
| H433 | CTGTC |
| H434 | CTGTG |
| H435 | CTGTT |
| H436 | CTTAA |
| H437 | CTTAC |
| H438 | CTTAG |
| H439 | CTTAT |

|      |       |
|------|-------|
| H440 | CTTCA |
| H441 | CTTCC |
| H442 | CTTCG |
| H443 | CTTCT |
| H444 | CTTGA |
| H445 | CTTGC |
| H446 | CTTGG |
| H447 | CTTGT |
| H448 | CTTTA |
| H449 | CTTTC |
| H450 | CTTTG |
| H451 | GAAAC |
| H452 | GAAAG |
| H453 | GAAAT |
| H454 | GAACA |
| H455 | GAACC |
| H456 | GAACG |
| H457 | GAACT |
| H458 | GAAGA |
| H459 | GAAGC |
| H460 | GAAGG |
| H461 | GAAGT |
| H462 | GAATA |
| H463 | GAATC |
| H464 | GAATG |
| H465 | GAATT |
| H466 | GACAA |
| H467 | GACAC |
| H468 | GACAG |
| H469 | GACAT |
| H470 | GACCA |
| H471 | GACCG |
| H472 | GACCT |
| H473 | GACGA |
| H474 | GACGC |
| H475 | GACGG |
| H476 | GACGT |
| H477 | GACTA |
| H478 | GACTC |
| H479 | GACTG |
| H480 | GACTT |
| H481 | GAGAA |
| H482 | GAGAC |

|      |       |
|------|-------|
| H483 | GAGAG |
| H484 | GAGAT |
| H485 | GAGCA |
| H486 | GAGCC |
| H487 | GAGCG |
| H488 | GAGCT |
| H489 | GAGGA |
| H490 | GAGGC |
| H491 | GAGGT |
| H492 | GAGTA |
| H493 | GAGTC |
| H494 | GAGTG |
| H495 | GAGTT |
| H496 | GATAA |
| H497 | GATAC |
| H498 | GATAG |
| H499 | GATAT |
| H500 | GATCA |
| H501 | GATCC |
| H502 | GATCG |
| H503 | GATCT |
| H504 | GATGA |
| H505 | GATGC |
| H506 | GATGG |
| H507 | GATGT |
| H508 | GATTA |
| H509 | GATTC |
| H510 | GATTG |
| H511 | GCAAC |
| H512 | GCAAG |
| H513 | GCAAT |
| H514 | GCACA |
| H515 | GCACC |
| H516 | GCACG |
| H517 | GCACT |
| H518 | GCAGA |
| H519 | GCAGC |
| H520 | GCAGG |
| H521 | GCAGT |
| H522 | GCATA |
| H523 | GCATC |
| H524 | GCATG |
| H525 | GCATT |

|      |       |
|------|-------|
| H526 | GCCAA |
| H527 | GCCAC |
| H528 | GCCAG |
| H529 | GCCAT |
| H530 | GCCCA |
| H531 | GCCCG |
| H532 | GCCCT |
| H533 | GCCGA |
| H534 | GCCGC |
| H535 | GCCGG |
| H536 | GCCGT |
| H537 | GCCTA |
| H538 | GCCTC |
| H539 | GCCTG |
| H540 | GCCTT |
| H541 | GCGAA |
| H542 | GCGAC |
| H543 | GCGAG |
| H544 | GCGAT |
| H545 | GCGCA |
| H546 | GCGCC |
| H547 | GCGCG |
| H548 | GCGCT |
| H549 | GCGGA |
| H550 | GCGGC |
| H551 | GCGGT |
| H552 | GCGTA |
| H553 | GCGTC |
| H554 | GCGTG |
| H555 | GCGTT |
| H556 | GCTAA |
| H557 | GCTAC |
| H558 | GCTAG |
| H559 | GCTAT |
| H560 | GCTCA |
| H561 | GCTCC |
| H562 | GCTCG |
| H563 | GCTCT |
| H564 | GCTGA |
| H565 | GCTGC |
| H566 | GCTGG |
| H567 | GCTGT |
| H568 | GCTTA |

|      |       |
|------|-------|
| H569 | GCTTC |
| H570 | GCTTG |
| H571 | GGAAC |
| H572 | GGAAG |
| H573 | GGAAT |
| H574 | GGACA |
| H575 | GGACC |
| H576 | GGACG |
| H577 | GGACT |
| H578 | GGAGA |
| H579 | GGAGC |
| H580 | GGAGG |
| H581 | GGAGT |
| H582 | GGATA |
| H583 | GGATC |
| H584 | GGATG |
| H585 | GGATT |
| H586 | GGCAA |
| H587 | GGCAC |
| H588 | GGCAG |
| H589 | GGCAT |
| H590 | GGCCA |
| H591 | GGCCG |
| H592 | GGCCT |
| H593 | GGCGA |
| H594 | GGCGC |
| H595 | GGCGG |
| H596 | GGCGT |
| H597 | GGCTA |
| H598 | GGCTC |
| H599 | GGCTG |
| H600 | GGCTT |
| H601 | GGGAA |
| H602 | GGGAC |
| H603 | GGGAG |
| H604 | GGGAT |
| H605 | GGGCA |
| H606 | GGTAA |
| H607 | GGTAC |
| H608 | GGTAG |
| H609 | GGTAT |
| H610 | GGTCA |
| H611 | GGTCC |

|      |       |
|------|-------|
| H612 | GGTCG |
| H613 | GGTCT |
| H614 | GGTGA |
| H615 | GGTGC |
| H616 | GGTGG |
| H617 | GGTGT |
| H618 | GGTTA |
| H619 | GGTTC |
| H620 | GGTTG |
| H621 | GTAAC |
| H622 | GTAAG |
| H623 | GTAAT |
| H624 | GTACA |
| H625 | GTACC |
| H626 | GTACG |
| H627 | GTACT |
| H628 | GTAGA |
| H629 | GTAGC |
| H630 | GTAGG |
| H631 | GTAGT |
| H632 | GTATA |
| H633 | GTATC |
| H634 | GTATG |
| H635 | GTATT |
| H636 | GTCAA |
| H637 | GTCAC |
| H638 | GTCAG |
| H639 | GTCAT |
| H640 | GTCCA |
| H641 | GTCCG |
| H642 | GTCCT |
| H643 | GTCGA |
| H644 | GTCGC |
| H645 | GTCGG |
| H646 | GTCGT |
| H647 | GTCTA |
| H648 | GTCTC |
| H649 | GTCTG |
| H650 | GTCTT |
| H651 | GTGAA |
| H652 | GTGAC |
| H653 | GTGAG |
| H654 | GTGAT |



|      |        |
|------|--------|
| H655 | GTGCA  |
| H656 | GTGCC  |
| H657 | GTGCG  |
| H658 | GTGCT  |
| H659 | GTGGA  |
| H660 | GTGGC  |
| H661 | GTGGT  |
| H662 | GTGTA  |
| H663 | GTGTC  |
| H664 | GTGTG  |
| H665 | GTGTT  |
| H666 | GT TAA |
| H667 | GT TAC |
| H668 | GT TAG |
| H669 | GT TAT |
| H670 | GT TCA |
| H671 | GT TCC |
| H672 | GT TCG |
| H673 | GT TCT |
| H674 | GT TGA |
| H675 | GT TGC |
| H676 | GT TGG |
| H677 | GT TGT |
| H678 | GT TTA |
| H679 | GT TTC |
| H680 | GT TTG |
| H681 | TAAAC  |
| H682 | TAAAG  |
| H683 | TAAAT  |
| H684 | TAACA  |
| H685 | TAACC  |
| H686 | TAACG  |
| H687 | TAACT  |
| H688 | TAAGA  |
| H689 | TAAGC  |
| H690 | TAAGG  |
| H691 | TAAGT  |
| H692 | TAATA  |
| H693 | TAATC  |
| H694 | TAATG  |
| H695 | TAATT  |
| H696 | TACAA  |
| H697 | TACAC  |

|      |       |
|------|-------|
| H698 | TACAG |
| H699 | TACAT |
| H700 | TACCA |
| H701 | TACCG |
| H702 | TACCT |
| H703 | TACGA |
| H704 | TACGC |
| H705 | TACGG |
| H706 | TACGT |
| H707 | TACTA |
| H708 | TACTC |
| H709 | TACTG |
| H710 | TACTT |
| H711 | TAGAA |
| H712 | TAGAC |
| H713 | TAGAG |
| H714 | TAGAT |
| H715 | TAGCA |
| H716 | TAGCC |
| H717 | TAGCG |
| H718 | TAGCT |
| H719 | TAGGA |
| H720 | TAGGC |
| H721 | TAGGT |
| H722 | TAGTA |
| H723 | TAGTC |
| H724 | TAGTG |
| H725 | TAGTT |
| H726 | TATAA |
| H727 | TATAC |
| H728 | TATAG |
| H729 | TATAT |
| H730 | TATCA |
| H731 | TATCC |
| H732 | TATCG |
| H733 | TATCT |
| H734 | TATGA |
| H735 | TATGC |
| H736 | TATGG |
| H737 | TATGT |
| H738 | TATTA |
| H739 | TATTC |
| H740 | TATTG |

|      |       |
|------|-------|
| H741 | TCAAC |
| H742 | TCAAG |
| H743 | TCAAT |
| H744 | TCACA |
| H745 | TCACC |
| H746 | TCACG |
| H747 | TCACT |
| H748 | TCAGA |
| H749 | TCAGC |
| H750 | TCAGG |
| H751 | TCAGT |
| H752 | TCATA |
| H753 | TCATC |
| H754 | TCATG |
| H755 | TCATT |
| H756 | TCCAA |
| H757 | TCCAC |
| H758 | TCCAG |
| H759 | TCCAT |
| H760 | TCCCA |
| H761 | TCCCG |
| H762 | TCCCT |
| H763 | TCCGA |
| H764 | TCCGC |
| H765 | TCCGG |
| H766 | TCCGT |
| H767 | TCCTA |
| H768 | TCCTC |
| H769 | TCCTG |
| H770 | TCCTT |
| H771 | TCGAA |
| H772 | TCGAC |
| H773 | TCGAG |
| H774 | TCGAT |
| H775 | TCGCA |
| H776 | TCGCC |
| H777 | TCGCG |
| H778 | TCGCT |
| H779 | TCGGA |
| H780 | TCGGC |
| H781 | TCGGT |
| H782 | TCGTA |
| H783 | TCGTC |

|      |       |
|------|-------|
| H784 | TCGTG |
| H785 | TCGTT |
| H786 | TCTAA |
| H787 | TCTAC |
| H788 | TCTAG |
| H789 | TCTAT |
| H790 | TCTCA |
| H791 | TCTCC |
| H792 | TCTCG |
| H793 | TCTCT |
| H794 | TCTGA |
| H795 | TCTGC |
| H796 | TCTGG |
| H797 | TCTGT |
| H798 | TCTTA |
| H799 | TCTTC |
| H800 | TCTTG |
| H801 | TGAAC |
| H802 | TGAAG |
| H803 | TGAAT |
| H804 | TGACA |
| H805 | TGACC |
| H806 | TGACG |
| H807 | TGACT |
| H808 | TGAGA |
| H809 | TGAGC |
| H810 | TGAGG |
| H811 | TGAGT |
| H812 | TGATA |
| H813 | TGATC |
| H814 | TGATG |
| H815 | TGATT |
| H816 | TGCAA |
| H817 | TGCAC |
| H818 | TGCAG |
| H819 | TGCAT |
| H820 | TGCCA |
| H821 | TGCCG |
| H822 | TGCCT |
| H823 | TGCGA |
| H824 | TGCGC |
| H825 | TGCGG |
| H826 | TGCGT |

|      |        |
|------|--------|
| H827 | TGCTA  |
| H828 | TGCTC  |
| H829 | TGCTG  |
| H830 | TGCTT  |
| H831 | TGGAA  |
| H832 | TGGAC  |
| H833 | TGGAG  |
| H834 | TGGAT  |
| H835 | TGGCA  |
| H836 | TGGCC  |
| H837 | TGGCG  |
| H838 | TGGCT  |
| H839 | TGGGA  |
| H840 | TGGGC  |
| H841 | TGGGT  |
| H842 | TGGTA  |
| H843 | TGGTC  |
| H844 | TGGTG  |
| H845 | TGGTT  |
| H846 | TGTAA  |
| H847 | TGTAC  |
| H848 | TGTAG  |
| H849 | TGTAT  |
| H850 | TGTCA  |
| H851 | TGTCC  |
| H852 | TGTCCG |
| H853 | TGTCT  |
| H854 | TGTGA  |
| H855 | TGTGC  |
| H856 | TGTGG  |
| H857 | TGTGT  |
| H858 | TGTTA  |
| H859 | TGTTC  |
| H860 | TGTTG  |
| H861 | TTAAC  |
| H862 | TTAAG  |
| H863 | TTAAT  |
| H864 | TTACA  |
| H865 | TTACC  |
| H866 | TTACG  |
| H867 | TTACT  |
| H868 | TTAGA  |
| H869 | TTAGC  |

|      |       |
|------|-------|
| H870 | TTAGG |
| H871 | TTAGT |
| H872 | TTATA |
| H873 | TTATC |
| H874 | TTATG |
| H875 | TTATT |
| H876 | TTCAA |
| H877 | TTCAC |
| H878 | TTCAG |
| H879 | TTCAT |
| H880 | TTCCA |
| H881 | TTCCG |
| H882 | TTCCT |
| H883 | TTCGA |
| H884 | TTCGC |
| H885 | TTCGG |
| H886 | TTCGT |
| H887 | TTCTA |
| H888 | TTCTC |
| H889 | TTCTG |
| H890 | TTCTT |
| H891 | TTGAA |
| H892 | TTGAC |
| H893 | TTGAG |
| H894 | TTGAT |
| H895 | TTGCA |
| H896 | TTGCC |
| H897 | TTGCG |
| H898 | TTGCT |
| H899 | TTGGA |
| H900 | TTGGC |
| H901 | TTGGT |
| H902 | TTGTA |
| H903 | TTGTC |
| H904 | TTGTG |
| H905 | TTGTT |
| H906 | TTTAA |
| H907 | TGTCT |
| H908 | TGTGA |
| H909 | TGTGC |
| H910 | TGTGG |
| H911 | TGTGT |
| H912 | TGTTA |

|      |        |
|------|--------|
| H913 | TG TTC |
| H914 | TG TTG |
| H915 | TG TTT |
| H916 | TT AAC |
| H917 | TT AAG |
| H918 | TT AAT |
| H919 | TT ACA |
| H920 | TT ACC |
| H921 | TT ACG |
| H922 | TT ACT |
| H923 | TT AGA |
| H924 | TT AGC |
| H925 | TT AGG |
| H926 | TT AGT |
| H927 | TT ATA |
| H928 | TT ATC |
| H929 | TT ATG |
| H930 | TT ATT |
| H931 | TT CAC |
| H932 | TT CAG |
| H933 | TT CAT |
| H934 | TT CCA |
| H935 | TT CCC |
| H936 | TT CCG |
| H937 | TT CCT |
| H938 | TT CGA |
| H939 | TT CGC |
| H940 | TT CGG |
| H941 | TT CGT |
| H942 | TT CTA |
| H943 | TT CTC |
| H944 | TT CTG |
| H945 | TT CTT |
| H946 | TT GAC |
| H947 | TT GAG |
| H948 | TT GAT |
| H949 | TT GCA |
| H950 | TT GCC |
| H951 | TT GCG |
| H952 | TT GCT |
| H953 | TT GGA |
| H954 | TT GGC |
| H955 | TT GGG |

|      |       |
|------|-------|
| H956 | TTGGT |
| H957 | TTGTA |
| H958 | TTGTC |
| H959 | TTGTG |
| H960 | TTGTT |
